# Supplementary material
Source: Springer Nature journal article supplement (https://www.springermedizin.de/resource/supplementary/13012_2010_313_MOESM4_ESM.pdf/9629694)
Supplement: MOESM4 [file 9629694]

**Context**

```
graph LR; Context[Context] --> FOI[Fidelity of implementation (FOI)]; FOI --> Effectiveness[Intervention Effectiveness]; subgraph FOI_Box [Fidelity of implementation (FOI)]; Consistency[Consistency]; Satisfaction[Satisfaction]; Quality[Quality]; end
```

**Fidelity of  
implementation  
(FOI)<sup>a</sup>**

**Consistency<sup>b</sup>**

**Satisfaction<sup>b</sup>**

**Quality<sup>b</sup>**

**Intervention  
Effectiveness**
